# Supplementary material for: Effect of Commonly Used Pediatric Antibiotics on Gut Microbial Diversity in Preschool Children in Burkina Faso: A Randomized Clinical Trial
Source: PubMed Central journal article supplement (PMC6262116; doi:10.1093/ofid/ofy289), 2018-11-02

# Baseline Visit

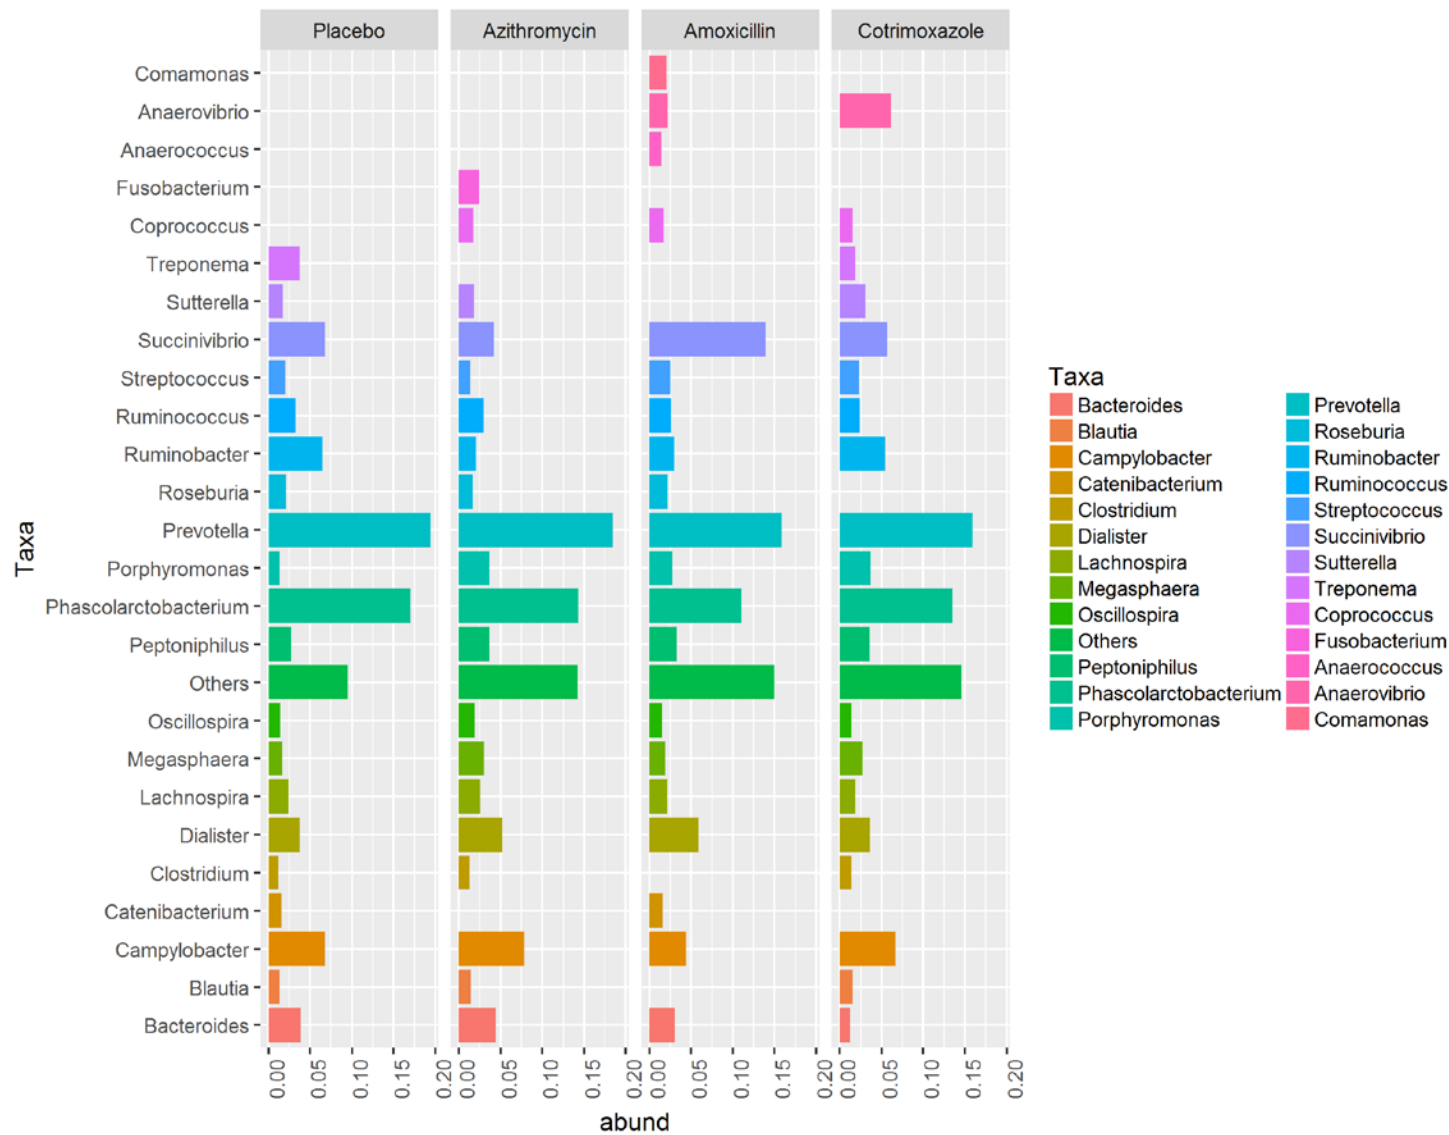

## 6-Day Visit

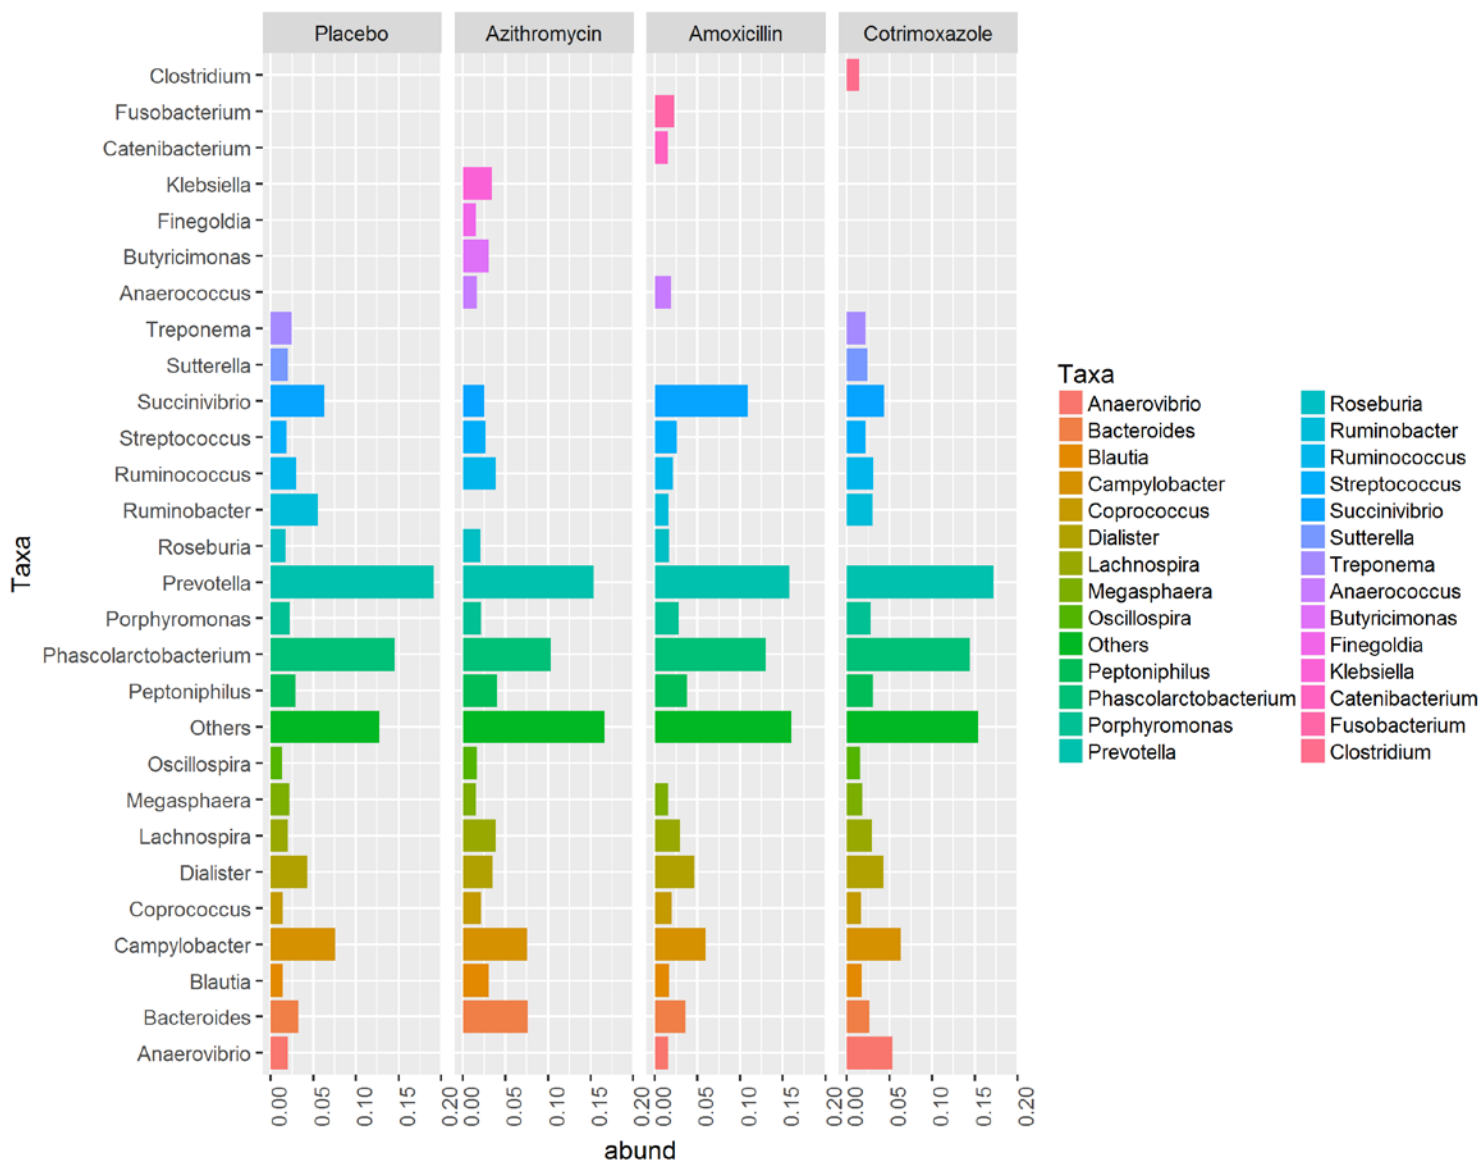

Supplement: ofy289_suppl_supplementary_table_1.pdf [file ofy289_suppl_supplementary_table_1.pdf]
